# Supplementary material
Source: HighWire-hosted journal article supplement (https://oem.bmj.com/content/75/2/79)
Supplement: inline-supplementary-material-1 [file inline-supplementary-material-1.pdf]

**Table S1.** Correlated pesticide intensity-weighted days of use for model adjustment

| Pesticides Studied    | Correlated at Spearman $\rho > 0.40$ |            |             |          |             |
|-----------------------|--------------------------------------|------------|-------------|----------|-------------|
| <b>INSECTICIDES</b>   |                                      |            |             |          |             |
| Organochlorine        |                                      |            |             |          |             |
| Aldrin                |                                      | Dieldrin   | Heptachlor  |          |             |
| Chlordane             |                                      | DDT        |             |          |             |
| DDT                   |                                      | 2,4,5 T    | Chlordane   |          |             |
| Heptachlor            |                                      | Aldrin     | Dieldrin    |          |             |
| Organophosphate       |                                      |            |             |          |             |
| Chlorpyrifos          |                                      |            |             |          |             |
| Diazinon              |                                      |            |             |          |             |
| Fonofos               |                                      |            |             |          |             |
| Malathion             |                                      | Glyphosate | Carbaryl    |          |             |
| Phorate               |                                      |            |             |          |             |
| Terbufos              |                                      |            |             |          |             |
| Carbamate             |                                      |            |             |          |             |
| Carbaryl              |                                      | Malathion  |             |          |             |
| Carbofuran            |                                      |            |             |          |             |
| Pyrethroid            |                                      |            |             |          |             |
| Permethrin            |                                      |            |             |          |             |
| <b>HERBICIDES</b>     |                                      |            |             |          |             |
| Dinitroaniline        |                                      |            |             |          |             |
| Pendimethalin         |                                      |            |             |          |             |
| Trifluralin           |                                      | Metribuzin | Butylate    |          |             |
| Thiocarbamate         |                                      |            |             |          |             |
| Butylate              |                                      | Metribuzin | Trifluralin |          |             |
| EPTC                  |                                      |            |             |          |             |
| Phenoxy               |                                      |            |             |          |             |
| 2,4-D                 |                                      | Atrazine   |             |          |             |
| 2,4,5 T               |                                      | DDT        |             |          |             |
| Triazine              |                                      |            |             |          |             |
| Atrazine              |                                      | 2,4-D      | Cyanazine   | Alachlor | Metolachlor |
| Cyanazine             |                                      | Atrazine   | Alachlor    |          |             |
| Metribuzin            |                                      | Butylate   | Trifluralin |          |             |
| Chloroacetanilide     |                                      |            |             |          |             |
| Alachlor              |                                      | Atrazine   | Cyanazine   |          |             |
| Metolachlor           |                                      | Atrazine   |             |          |             |
| Other Herbicides      |                                      |            |             |          |             |
| Chlorimuron-ethyl     |                                      |            |             |          |             |
| Dicamba               |                                      |            |             |          |             |
| Glyphosate            |                                      |            |             |          |             |
| Imazethapyr           |                                      |            |             |          |             |
| Petroleum distillates |                                      |            |             |          |             |
| <b>FUNGICIDES</b>     |                                      |            |             |          |             |
| Captan                |                                      |            |             |          |             |
| Metalaxyl             |                                      |            |             |          |             |
| <b>FUMIGANTS</b>      |                                      |            |             |          |             |
| Carbon tetrachloride  |                                      |            |             |          |             |
| /Carbon disulfide     |                                      |            |             |          |             |
| Methyl bromide        |                                      |            |             |          |             |

**Table S2.** Multivariate<sup>a</sup> logistic regression examining intensity-weighted days of use of specific pesticides and positive anti-TPO autoantibody assay

|                         | Intensity-weighted days | N <sup>b</sup> | OR   | 95% CI       |
|-------------------------|-------------------------|----------------|------|--------------|
| <b>INSECTICIDES</b>     |                         |                |      |              |
| Organochlorine          |                         |                |      |              |
| Aldrin <sup>c</sup>     | 0                       | 85             | 1.00 | (ref)        |
|                         | 26–392                  | 10             | 0.78 | (0.19, 3.23) |
|                         | >392–10339              | 18             | 2.31 | (0.79, 6.73) |
|                         | P <sub>trend</sub>      |                |      | 0.12         |
| Chlordane <sup>c</sup>  | 0                       | 92             | 1.00 | (ref)        |
|                         | 24–315                  | 9              | 1.12 | (0.32, 4.00) |
|                         | >315–13020              | 11             | 0.95 | (0.26, 3.53) |
|                         | P <sub>trend</sub>      |                |      | 0.96         |
| DDT <sup>c</sup>        | 0                       | 92             | 1.00 | (ref)        |
|                         | 18–662                  | 10             | 0.21 | (0.03, 1.71) |
|                         | >662–172800             | 11             | 2.28 | (0.73, 7.15) |
|                         | P <sub>trend</sub>      |                |      | 0.09         |
| Heptachlor <sup>c</sup> | 0                       | 93             | 1.00 | (ref)        |
|                         | 26–474                  | 11             | 0.77 | (0.19, 3.18) |
|                         | >474–30680              | 10             | 0.84 | (0.21, 3.35) |
|                         | P <sub>trend</sub>      |                |      | 0.79         |
| Organophosphate         |                         |                |      |              |
| Chlorpyrifos            | 0                       | 60             | 1.00 | (ref)        |
|                         | 25–1005                 | 33             | 1.54 | (0.84, 2.86) |
|                         | >1005–53708             | 32             | 1.14 | (0.59, 2.20) |
|                         | P <sub>trend</sub>      |                |      | 0.95         |
| Diazinon <sup>c</sup>   | 0                       | 86             | 1.00 | (ref)        |
|                         | 28–420                  | 11             | 0.44 | (0.10, 1.89) |
|                         | >420–13423              | 13             | 1.53 | (0.55, 4.22) |
|                         | P <sub>trend</sub>      |                |      | 0.58         |
| Fonofos                 | 0                       | 78             | 1.00 | (ref)        |
|                         | 28–982                  | 22             | 0.70 | (0.33, 1.50) |
|                         | >982–21948              | 23             | 0.78 | (0.36, 1.69) |
|                         | P <sub>trend</sub>      |                |      | 0.57         |
| Malathion <sup>c</sup>  | 0                       | 29             | 1.00 | (ref)        |
|                         | 20–780                  | 27             | 0.49 | (0.21, 1.13) |
|                         | >780–117600             | 32             | 1.01 | (0.50, 2.06) |
|                         | P <sub>trend</sub>      |                |      | 0.50         |
| Phorate <sup>3</sup>    | 0                       | 79             | 1.00 | (ref)        |
|                         | 28–588                  | 12             | 0.35 | (0.10, 1.18) |
|                         | >588–37758              | 15             | 1.18 | (0.54, 2.60) |
|                         | P <sub>trend</sub>      |                |      | 0.66         |
| Terbufos                | 0                       | 62             | 1.00 | (ref)        |
|                         | 34–1259                 | 33             | 1.01 | (0.53, 1.93) |
|                         | >1259–17748             | 28             | 0.99 | (0.51, 1.92) |
|                         | P <sub>trend</sub>      |                |      | 0.97         |

|                            | Intensity–<br>weighted days | N <sup>b</sup> | OR   | 95% CI                    |
|----------------------------|-----------------------------|----------------|------|---------------------------|
| <b>Carbamate</b>           |                             |                |      |                           |
| Carbaryl <sup>c</sup>      | 0                           | 71             | 1.00 | (ref)                     |
|                            | 28–662                      | 17             | 1.18 | (0.47, 2.95)              |
|                            | >662–227850                 | 16             | 1.77 | (0.66, 4.72)              |
|                            | P <sub>trend</sub>          |                |      | 0.27                      |
| Carbofuran                 | 0                           | 67             | 1.00 | (ref)                     |
|                            | 28–858                      | 27             | 1.48 | (0.76, 2.88)              |
|                            | >858–33837                  | 26             | 1.50 | (0.76, 2.98)              |
|                            | P <sub>trend</sub>          |                |      | 0.28                      |
| <b>Other Insecticides</b>  |                             |                |      |                           |
| Permethrin                 | 0                           | 89             | 1.00 | (ref)                     |
|                            | 24–599                      | 14             | 0.77 | (0.35, 1.72)              |
|                            | >599–612000                 | 20             | 1.34 | (0.68, 2.63)              |
|                            | P <sub>trend</sub>          |                |      | 0.35                      |
| <b>HERBICIDES</b>          |                             |                |      |                           |
| <b>Dinitroaniline</b>      |                             |                |      |                           |
| Pendimethalin <sup>c</sup> | 0                           | 68             | 1.00 | (ref)                     |
|                            | 28–375                      | 16             | 1.59 | (0.69, 3.66)              |
|                            | >375–14105                  | 17             | 2.69 | (1.29, 5.60) <sup>†</sup> |
|                            | P <sub>trend</sub>          |                |      | 0.01 <sup>†</sup>         |
| Trifluralin                | 0                           | 55             | 1.00 | (ref)                     |
|                            | 25–1411                     | 28             | 1.06 | (0.50, 2.21)              |
|                            | >1411–113400                | 41             | 1.22 | (0.59, 2.54)              |
|                            | P <sub>trend</sub>          |                |      | 0.58                      |
| <b>Thiocarbamate</b>       |                             |                |      |                           |
| Butylate <sup>c</sup>      | 0                           | 66             | 1.00 | (ref)                     |
|                            | 43–882                      | 15             | 0.74 | (0.26, 2.08)              |
|                            | >882–22925                  | 21             | 1.16 | (0.47, 2.85)              |
|                            | P <sub>trend</sub>          |                |      | 0.65                      |
| EPTC                       | 0                           | 87             | 1.00 | (ref)                     |
|                            | 33–588                      | 14             | 0.57 | (0.20, 1.66)              |
|                            | >588–16461                  | 19             | 1.46 | (0.67, 3.15)              |
|                            | P <sub>trend</sub>          |                |      | 0.33                      |
| <b>Phenoxy</b>             |                             |                |      |                           |
| 2,4-D                      | 0                           | 25             | 1.00 | (ref)                     |
|                            | 68–2604                     | 48             | 0.65 | (0.32, 1.34)              |
|                            | >2604–192780                | 53             | 0.53 | (0.25, 1.13)              |
|                            | P <sub>trend</sub>          |                |      | 0.22                      |
| 2,4,5 T <sup>c</sup>       | 0                           | 88             | 1.00 | (ref)                     |
|                            | 25–458                      | 12             | 0.90 | (0.25, 3.28)              |
|                            | >458–29869                  | 13             | 1.89 | (0.73, 4.88)              |
|                            | P <sub>trend</sub>          |                |      | 0.19                      |
| <b>Triazine</b>            |                             |                |      |                           |
| Atrazine                   | 0                           | 19             | 1.00 | (ref)                     |
|                            | 25–2604                     | 43             | 1.72 | (0.65, 4.52)              |
|                            | >2604–113400                | 65             | 2.15 | (0.75, 6.11)              |
|                            | P <sub>trend</sub>          |                |      | 0.29                      |

|                                                        | Intensity–<br>weighted days | N <sup>b</sup> | OR   | 95% CI       |
|--------------------------------------------------------|-----------------------------|----------------|------|--------------|
| Cyanazine                                              | 0                           | 48             | 1.00 | (ref)        |
|                                                        | 25–1313                     | 24             | 0.66 | (0.31, 1.40) |
|                                                        | >1313–113400                | 48             | 1.20 | (0.59, 2.42) |
|                                                        | P <sub>trend</sub>          |                |      | 0.35         |
| Metribuzin <sup>c</sup>                                | 0                           | 61             | 1.00 | (ref)        |
|                                                        | 33–385                      | 14             | 0.86 | (0.33, 2.26) |
|                                                        | >385–14850                  | 21             | 1.71 | (0.71, 4.12) |
|                                                        | P <sub>trend</sub>          |                |      | 0.18         |
| Chloroacetanilide                                      |                             |                |      |              |
| Alachlor                                               | 0                           | 36             | 1.00 | (ref)        |
|                                                        | 25–1358                     | 41             | 0.86 | (0.42, 1.73) |
|                                                        | >1358–68162                 | 42             | 0.91 | (0.45, 1.83) |
|                                                        | P <sub>trend</sub>          |                |      | 0.92         |
| Metolachlor                                            | 0                           | 54             | 1.00 | (ref)        |
|                                                        | 25–1240                     | 35             | 0.58 | (0.28, 1.21) |
|                                                        | >1240–68162                 | 31             | 0.98 | (0.50, 1.91) |
|                                                        | P <sub>trend</sub>          |                |      | 0.71         |
| Other Herbicides                                       |                             |                |      |              |
| Chlorimuron-ethyl <sup>c</sup>                         | 0                           | 74             | 1.00 | (ref)        |
|                                                        | 30–315                      | 14             | 1.56 | (0.68, 3.57) |
|                                                        | >315–7560                   | 14             | 0.92 | (0.37, 2.29) |
|                                                        | P <sub>trend</sub>          |                |      | 0.92         |
| Dicamba                                                | 0                           | 42             | 1.00 | (ref)        |
|                                                        | 36–1046                     | 35             | 0.66 | (0.33, 1.31) |
|                                                        | >1046–107823                | 40             | 0.87 | (0.45, 1.68) |
|                                                        | P <sub>trend</sub>          |                |      | 0.89         |
| Glyphosate                                             | 0                           | 32             | 1.00 | (ref)        |
|                                                        | 20–907                      | 49             | 0.77 | (0.39, 1.53) |
|                                                        | >907–113400                 | 46             | 1.00 | (0.49, 2.01) |
|                                                        | P <sub>trend</sub>          |                |      | 0.67         |
| Imazethapyr                                            | 0                           | 62             | 1.00 | (ref)        |
|                                                        | 33–600                      | 26             | 1.06 | (0.53, 2.11) |
|                                                        | >600–22500                  | 30             | 1.40 | (0.73, 2.67) |
|                                                        | P <sub>trend</sub>          |                |      | 0.30         |
| Petroleum Distillates <sup>c</sup>                     | 0                           | 74             | 1.00 | (ref)        |
|                                                        | 25–1110                     | 9              | 0.16 | (0.02, 1.17) |
|                                                        | >1110–253333                | 12             | 1.66 | (0.75, 3.69) |
|                                                        | P <sub>trend</sub>          |                |      | 0.17         |
| FUMIGANTS                                              |                             |                |      |              |
| Carbon tetrachloride/<br>Carbon disulfide <sup>c</sup> | 0                           | 113            | 1.00 | (ref)        |
|                                                        | 6–170                       | 4              | 1.53 | (0.34, 6.82) |
|                                                        | >170–18563                  | 3              | 0.48 | (0.05, 4.55) |
|                                                        | P <sub>trend</sub>          |                |      | 0.48         |
| Methyl Bromide                                         | 0                           | 117            | 1.00 | (ref)        |
|                                                        | 12–1139                     | 6              | --   | --           |
|                                                        | >1139–102000                | 3              | 1.59 | (0.33, 7.59) |
|                                                        | P <sub>trend</sub>          |                |      | 0.62         |
| FUNGICIDES                                             |                             |                |      |              |
| Captan                                                 | 0                           | 103            | 1.00 | (ref)        |

|                        | Intensity-weighted days | N <sup>b</sup> | OR   | 95% CI       |
|------------------------|-------------------------|----------------|------|--------------|
| Metalaxyl <sup>c</sup> | 2–12                    | 3              | 0.28 | (0.04, 2.09) |
|                        | >12–46500               | 10             | 1.67 | (0.61, 4.57) |
|                        | P <sub>trend</sub>      |                |      | 0.29         |
|                        | 0                       | 105            | 1.00 | (ref)        |
|                        | 3–141                   | 6              | 0.38 | (0.05, 2.89) |
|                        | >141–30341              | 4              | 1.35 | 0.65         |
|                        | P <sub>trend</sub>      |                |      |              |

Anti-TPO: Anti-thyroid peroxidase; OR: odds ratio; 95% CI: 95% Confidence Interval

<sup>a</sup>Adjusted for age, state, body-mass index, smoking, correlated pesticides

<sup>b</sup>Exposed cases

<sup>c</sup>Detailed information for these chemicals was collected on the take-home questionnaire at enrollment

<sup>†</sup>p<0.05 compared with never users

**Table S3.** Multivariate<sup>a</sup> regression models examining association between intensity-weighted days of specific pesticides and subclinical hypothyroidism (TSH>4.5 mIU/L) and natural log of TSH, T4, and T3, excluding participants with any anti-TPO positivity (N=65)

|                               | Intensity-weighted days | Subclinical hypothyroidism |                                | TSH and Thyroid Hormones |                                |                                |                     |
|-------------------------------|-------------------------|----------------------------|--------------------------------|--------------------------|--------------------------------|--------------------------------|---------------------|
|                               |                         | N <sup>b</sup>             | OR (95% CI)                    | N <sup>c</sup>           | TSH<br>Expβ (95% CI)           | T4<br>Expβ (95% CI)            | T3<br>Expβ (95% CI) |
| <b>INSECTICIDES</b>           |                         |                            |                                |                          |                                |                                |                     |
| <b>Organochlorine</b>         |                         |                            |                                |                          |                                |                                |                     |
| <b>Aldrin<sup>d</sup></b>     |                         |                            |                                |                          |                                |                                |                     |
|                               | 0                       | 62                         | 1.00 (ref)                     | 480                      | 1.00 (ref)                     | 1.00 (ref)                     | 1.00 (ref)          |
|                               | 26–210                  | 5                          | 1.12 (0.33, 3.80)              | 24                       | 1.17 (0.90, 1.52)              | 1.06 (0.94, 1.18)              | 1.07 (0.95, 1.21)   |
|                               | >210–392                | 4                          | 1.16 (0.29, 4.67)              | 17                       | 0.84 (0.61, 1.14)              | 1.03 (0.90, 1.18)              | 0.98 (0.85, 1.13)   |
|                               | >392–1117               | 7                          | 3.74 (1.27, 11.0) <sup>†</sup> | 17                       | 1.33 (1.00, 1.77) <sup>†</sup> | 1.11 (0.98, 1.25)              | 1.01 (0.89, 1.16)   |
|                               | >1117–10339             | 7                          | 4.36 (1.15, 16.6) <sup>†</sup> | 18                       | 1.22 (0.89, 1.67)              | 0.91 (0.79, 1.04)              | 0.92 (0.79, 1.06)   |
|                               | P <sub>trend</sub>      |                            | 0.01 <sup>†</sup>              |                          | 0.07                           | 0.36                           | 0.29                |
| <b>Chlordane<sup>d</sup></b>  |                         |                            |                                |                          |                                |                                |                     |
|                               | 0                       | 70                         | 1.00 (ref)                     | 470                      | 1.00 (ref)                     | 1.00 (ref)                     | 1.00 (ref)          |
|                               | 24–210                  | 4                          | 1.02 (0.31, 3.36)              | 21                       | 0.97 (0.75, 1.25)              | 0.99 (0.89, 1.11)              | 0.96 (0.85, 1.08)   |
|                               | >210–315                | 4                          | 1.86 (0.52, 6.65)              | 15                       | 0.90 (0.67, 1.22)              | 1.02 (0.89, 1.16)              | 1.02 (0.88, 1.18)   |
|                               | >315–980                | 4                          | 1.09 (0.32, 3.78)              | 19                       | 1.05 (0.80, 1.38)              | 1.04 (0.92, 1.18)              | 1.03 (0.91, 1.18)   |
|                               | >980–13020              | 3                          | 0.92 (0.22, 3.87)              | 16                       | 0.99 (0.72, 1.36)              | 0.96 (0.84, 1.10)              | 1.08 (0.93, 1.26)   |
|                               | P <sub>trend</sub>      |                            | 0.96                           |                          | 0.94                           | 0.61                           | 0.27                |
| <b>DDT<sup>d</sup></b>        |                         |                            |                                |                          |                                |                                |                     |
|                               | 0                       | 68                         | 1.00 (ref)                     | 477                      | 1.00 (ref)                     | 1.00 (ref)                     | 1.00 (ref)          |
|                               | 18–240                  | 5                          | 1.00 (0.30, 3.32)              | 22                       | 0.97 (0.74, 1.27)              | 1.01 (0.89, 1.13)              | 1.05 (0.93, 1.19)   |
|                               | >240–662                | 4                          | 0.79 (0.22, 2.79)              | 20                       | 1.13 (0.85, 1.49)              | 1.04 (0.92, 1.17)              | 1.02 (0.90, 1.16)   |
|                               | >662–2625               | 4                          | 0.81 (0.21, 3.07)              | 18                       | 0.93 (0.69, 1.26)              | 1.11 (0.97, 1.26)              | 1.07 (0.93, 1.23)   |
|                               | >2625–172800            | 4                          | 0.74 (0.18, 2.96)              | 19                       | 1.02 (0.75, 1.39)              | 1.09 (0.95, 1.24)              | 1.00 (0.87, 1.15)   |
|                               | P <sub>trend</sub>      |                            | 0.72                           |                          | 0.93                           | 0.29                           | 0.83                |
| <b>Heptachlor<sup>d</sup></b> |                         |                            |                                |                          |                                |                                |                     |
|                               | 0                       | 70                         | 1.00 (ref)                     | 496                      | 1.00 (ref)                     | 1.00 (ref)                     | 1.00 (ref)          |
|                               | 26–182                  | 4                          | 1.53 (0.42, 5.64)              | 18                       | 1.12 (0.83, 1.51)              | 0.94 (0.83, 1.07)              | 0.91 (0.79, 1.04)   |
|                               | >182–474                | 6                          | 3.73 (1.09, 12.8) <sup>†</sup> | 16                       | 1.35 (1.00, 1.82) <sup>†</sup> | 1.05 (0.92, 1.19)              | 0.92 (0.80, 1.05)   |
|                               | >474–980                | 6                          | 1.50 (0.38, 5.85)              | 17                       | 1.16 (0.84, 1.61)              | 0.92 (0.80, 1.05)              | 0.98 (0.85, 1.14)   |
|                               | >980–30680              | 2                          | 0.39 (0.07, 2.23)              | 16                       | 1.02 (0.74, 1.40)              | 1.05 (0.92, 1.21)              | 1.06 (0.92, 1.23)   |
|                               | P <sub>trend</sub>      |                            | 0.65                           |                          | 0.53                           | 0.89                           | 0.65                |
| <b>Organophosphate</b>        |                         |                            |                                |                          |                                |                                |                     |
| <b>Chlorpyrifos</b>           |                         |                            |                                |                          |                                |                                |                     |
|                               | 0                       | 50                         | 1.00 (ref)                     | 292                      | 1.00 (ref)                     | 1.00 (ref)                     | 1.00 (ref)          |
|                               | 25–407                  | 10                         | 0.83 (0.39, 1.75)              | 78                       | 0.92 (0.79, 1.06)              | 1.01 (0.95, 1.07)              | 1.02 (0.95, 1.09)   |
|                               | >407–1005               | 13                         | 1.21 (0.61, 2.42)              | 71                       | 1.04 (0.90, 1.22)              | 1.03 (0.96, 1.10)              | 1.02 (0.96, 1.10)   |
|                               | >1005–2807              | 16                         | 1.37 (0.72, 2.61)              | 76                       | 1.02 (0.88, 1.18)              | 1.07 (1.01, 1.14) <sup>†</sup> | 1.02 (0.95, 1.09)   |
|                               | >2807–53708             | 8                          | 0.56 (0.25, 1.24)              | 79                       | 0.96 (0.83, 1.10)              | 1.04 (0.98, 1.10)              | 1.01 (0.95, 1.08)   |
|                               | P <sub>trend</sub>      |                            | 0.22                           |                          | 0.68                           | 0.16                           | 0.73                |

|                                 | Intensity-weighted days | Subclinical hypothyroidism |                                | TSH and Thyroid Hormones |                      |                                |                                |
|---------------------------------|-------------------------|----------------------------|--------------------------------|--------------------------|----------------------|--------------------------------|--------------------------------|
|                                 |                         | N <sup>b</sup>             | OR (95% CI)                    | N <sup>c</sup>           | TSH<br>Expβ (95% CI) | T4<br>Expβ (95% CI)            | T3<br>Expβ (95% CI)            |
| Diazinon <sup>d</sup>           | 0                       | 63                         | 1.00 (ref)                     | 462                      | 1.00 (ref)           | 1.00 (ref)                     | 1.00 (ref)                     |
|                                 | 28–236                  | 4                          | 1.79 (0.56, 5.72)              | 19                       | 1.23 (0.94, 1.60)    | 0.94 (0.84, 1.06)              | 1.00 (0.88, 1.13)              |
|                                 | >236–420                | 6                          | 3.11 (1.10, 8.84) <sup>†</sup> | 19                       | 1.11 (0.86, 1.45)    | 1.04 (0.93, 1.17)              | 1.05 (0.93, 1.19)              |
|                                 | >420–882                | 5                          | 2.34 (0.76, 7.16)              | 16                       | 1.16 (0.87, 1.54)    | 1.05 (0.93, 1.19)              | 1.00 (0.87, 1.14)              |
|                                 | >882–13423              | 4                          | 1.35 (0.41, 4.41)              | 18                       | 1.13 (0.86, 1.49)    | 1.08 (0.96, 1.22)              | 1.02 (0.90, 1.16)              |
|                                 | P <sub>trend</sub>      |                            | 0.38                           |                          | 0.28                 | 0.16                           | 0.72                           |
| Fonofos                         | 0                       | 57                         | 1.00 (ref)                     | 388                      | 1.00 (ref)           | 1.00 (ref)                     | 1.00 (ref)                     |
|                                 | 28–368                  | 10                         | 1.64 (0.76, 3.55)              | 53                       | 0.96 (0.81, 1.13)    | 0.99 (0.93, 1.07)              | 0.98 (0.91, 1.06)              |
|                                 | >368–982                | 10                         | 1.65 (0.75, 3.59)              | 47                       | 1.03 (0.86, 1.23)    | 1.05 (0.97, 1.13)              | 1.04 (0.96, 1.13)              |
|                                 | >982–2646               | 11                         | 1.49 (0.70, 3.19)              | 50                       | 0.97 (0.82, 1.16)    | 0.99 (0.92, 1.06)              | 1.06 (0.98, 1.14)              |
|                                 | >2646–21948             | 7                          | 0.99 (0.41, 2.39)              | 50                       | 1.16 (0.98, 1.38)    | 1.02 (0.95, 1.10)              | 0.94 (0.87, 1.01)              |
|                                 | P <sub>trend</sub>      |                            | 0.97                           |                          | 0.11                 | 0.67                           | 0.23                           |
| Malathion <sup>d</sup>          | 0                       | 22                         | 1.00 (ref)                     | 161                      | 1.00 (ref)           | 1.00 (ref)                     | 1.00 (ref)                     |
|                                 | 20–276                  | 10                         | 1.27 (0.52, 3.06)              | 70                       | 0.94 (0.8, 1.12)     | 1.01 (0.94, 1.09)              | 1.03 (0.95, 1.11)              |
|                                 | >276–780                | 12                         | 1.40 (0.59, 3.33)              | 70                       | 1.07 (0.90, 1.27)    | 1.01 (0.93, 1.08)              | 1.03 (0.95, 1.12)              |
|                                 | >780–2250               | 11                         | 1.12 (0.45, 2.81)              | 70                       | 0.93 (0.78, 1.11)    | 1.05 (0.97, 1.14)              | 1.02 (0.94, 1.11)              |
|                                 | >2250–117600            | 12                         | 1.64 (0.67, 4.02)              | 68                       | 1.11 (0.92, 1.33)    | 1.03 (0.95, 1.12)              | 1.03 (0.94, 1.12)              |
|                                 | P <sub>trend</sub>      |                            | 0.37                           |                          | 0.22                 | 0.44                           | 0.76                           |
| Phorate <sup>d</sup>            | 0                       | 61                         | 1.00 (ref)                     | 385                      | 1.00 (ref)           | 1.00 (ref)                     | 1.00 (ref)                     |
|                                 | 28–236                  | 5                          | 0.90 (0.33, 2.50)              | 33                       | 1.02 (0.83, 1.26)    | 0.99 (0.91, 1.08)              | 0.98 (0.89, 1.07)              |
|                                 | >236–588                | 6                          | 0.87 (0.33, 2.27)              | 38                       | 1.09 (0.90, 1.33)    | 1.02 (0.94, 1.11)              | 1.04 (0.95, 1.13)              |
|                                 | >588–1302               | 5                          | 0.88 (0.32, 2.43)              | 33                       | 1.18 (0.96, 1.45)    | 1.00 (0.92, 1.09)              | 0.95 (0.87, 1.04)              |
|                                 | >1302–37758             | 6                          | 0.92 (0.34, 2.46)              | 33                       | 1.05 (0.85, 1.29)    | 1.04 (0.95, 1.13)              | 0.98 (0.90, 1.08)              |
|                                 | P <sub>trend</sub>      |                            | 0.85                           |                          | 0.44                 | 0.41                           | 0.58                           |
| Terbufos                        | 0                       | 48                         | 1.00 (ref)                     | 280                      | 1.00 (ref)           | 1.00 (ref)                     | 1.00 (ref)                     |
|                                 | 34–463                  | 14                         | 1.34 (0.67, 2.67)              | 77                       | 0.95 (0.82, 1.1)     | 1.00 (0.94, 1.06)              | 1.08 (1.01, 1.15) <sup>†</sup> |
|                                 | >463–1259               | 11                         | 0.88 (0.43, 1.84)              | 78                       | 1 (0.86, 1.15)       | 1.01 (0.95, 1.07)              | 1.03 (0.96, 1.1)               |
|                                 | >1259–3368              | 10                         | 0.73 (0.34, 1.55)              | 78                       | 0.97 (0.84, 1.12)    | 1.02 (0.95, 1.08)              | 1.08 (1.01, 1.15) <sup>†</sup> |
|                                 | >3368–17748             | 12                         | 0.97 (0.47, 1.98)              | 78                       | 1 (0.86, 1.16)       | 1.04 (0.98, 1.11)              | 1.08 (1.01, 1.15) <sup>†</sup> |
|                                 | P <sub>trend</sub>      |                            | 0.75                           |                          | 0.93                 | 0.16                           | 0.06                           |
| Carbamate Carbaryl <sup>d</sup> | 0                       | 57                         | 1.00 (ref)                     | 360                      | 1.00 (ref)           | 1.00 (ref)                     | 1.00 (ref)                     |
|                                 | 28–200                  | 5                          | 0.75 (0.26, 2.18)              | 36                       | 0.82 (0.68, 1.01)    | 1.01 (0.93, 1.10)              | 1.06 (0.96, 1.16)              |
|                                 | >200–662                | 7                          | 1.41 (0.54, 3.70)              | 34                       | 1.00 (0.81, 1.22)    | 1.02 (0.93, 1.12)              | 1.05 (0.95, 1.16)              |
|                                 | >662–2315               | 7                          | 1.11 (0.40, 3.09)              | 37                       | 1.07 (0.87, 1.32)    | 1.10 (1.00, 1.20) <sup>†</sup> | 1.03 (0.94, 1.14)              |
|                                 | >2315–227850            | 3                          | 0.24 (0.06, 1.05)              | 33                       | 0.94 (0.74, 1.20)    | 0.95 (0.85, 1.06)              | 0.90 (0.80, 1.01)              |
|                                 | P <sub>trend</sub>      |                            | 0.05                           |                          | 0.74                 | 0.32                           | 0.04                           |

|                                              | Intensity-weighted days | Subclinical hypothyroidism |                   | TSH and Thyroid Hormones |                                |                     |                     |
|----------------------------------------------|-------------------------|----------------------------|-------------------|--------------------------|--------------------------------|---------------------|---------------------|
|                                              |                         | N <sup>b</sup>             | OR (95% CI)       | N <sup>c</sup>           | TSH<br>Expβ (95% CI)           | T4<br>Expβ (95% CI) | T3<br>Expβ (95% CI) |
| Carbofuran                                   | 0                       | 55                         | 1.00 (ref)        | 378                      | 1.00 (ref)                     | 1.00 (ref)          | 1.00 (ref)          |
|                                              | 28–294                  | 7                          | 1.10 (0.46, 2.61) | 46                       | 0.79 (0.66, 0.94) <sup>†</sup> | 1.00 (0.92, 1.07)   | 1.01 (0.93, 1.09)   |
|                                              | >294–858                | 11                         | 1.55 (0.74, 3.25) | 54                       | 1.07 (0.91, 1.26)              | 1.03 (0.96, 1.10)   | 1.00 (0.93, 1.08)   |
|                                              | >858–2016               | 8                          | 1.02 (0.44, 2.35) | 47                       | 1.04 (0.87, 1.24)              | 0.96 (0.89, 1.04)   | 1.01 (0.93, 1.09)   |
|                                              | >2016–33837             | 11                         | 1.42 (0.68, 2.99) | 55                       | 0.99 (0.84, 1.16)              | 1.03 (0.96, 1.11)   | 1.04 (0.97, 1.12)   |
|                                              | P <sub>trend</sub>      |                            | 0.39              |                          | 0.86                           | 0.48                | 0.31                |
| Pyrethroid<br>Permethrin                     | 0                       | 71                         | 1.00 (ref)        | 417                      | 1.00 (ref)                     | 1.00 (ref)          | 1.00 (ref)          |
|                                              | 24–230                  | 7                          | 0.95 (0.40, 2.24) | 46                       | 0.93 (0.78, 1.10)              | 0.95 (0.88, 1.02)   | 0.97 (0.89, 1.05)   |
|                                              | >230–599                | 5                          | 0.65 (0.25, 1.74) | 46                       | 0.83 (0.70, 0.99) <sup>†</sup> | 1.03 (0.96, 1.12)   | 0.98 (0.90, 1.06)   |
|                                              | >599–2021               | 7                          | 0.97 (0.41, 2.31) | 44                       | 0.96 (0.80, 1.15)              | 1.07 (0.99, 1.16)   | 1.05 (0.97, 1.14)   |
|                                              | >2021–612000            | 5                          | 0.73 (0.27, 1.94) | 43                       | 1.02 (0.85, 1.22)              | 1.07 (0.99, 1.15)   | 1.03 (0.95, 1.12)   |
|                                              | P <sub>trend</sub>      |                            | 0.54              |                          | 0.77                           | 0.06                | 0.34                |
| <b>HERBICIDES</b>                            |                         |                            |                   |                          |                                |                     |                     |
| Dinitroaniline<br>Pendimethalin <sup>d</sup> | 0                       | 56                         | 1.00 (ref)        | 381                      | 1.00 (ref)                     | 1.00 (ref)          | 1.00 (ref)          |
|                                              | 28–208                  | 6                          | 1.18 (0.46, 3.04) | 32                       | 0.92 (0.75, 1.14)              | 0.99 (0.91, 1.09)   | 1.01 (0.92, 1.11)   |
|                                              | >208–375                | 5                          | 1.03 (0.37, 2.92) | 31                       | 0.95 (0.77, 1.17)              | 1.00 (0.92, 1.10)   | 1.00 (0.90, 1.10)   |
|                                              | >375–1920               | 3                          | 0.67 (0.19, 2.35) | 30                       | 1.05 (0.85, 1.30)              | 1.01 (0.92, 1.11)   | 1.01 (0.92, 1.12)   |
|                                              | >1920–14105             | 7                          | 1.86 (0.73, 4.73) | 29                       | 1.12 (0.90, 1.38)              | 1.01 (0.92, 1.11)   | 0.96 (0.86, 1.06)   |
|                                              | P <sub>trend</sub>      |                            | 0.25              |                          | 0.28                           | 0.85                | 0.45                |
| Trifluralin                                  | 0                       | 46                         | 1.00 (ref)        | 282                      | 1.00 (ref)                     | 1.00 (ref)          | 1.00 (ref)          |
|                                              | 25–632                  | 10                         | 0.66 (0.29, 1.49) | 79                       | 0.96 (0.82, 1.11)              | 0.98 (0.92, 1.05)   | 0.99 (0.93, 1.06)   |
|                                              | >632–1411               | 11                         | 0.70 (0.31, 1.59) | 79                       | 0.89 (0.76, 1.04)              | 1.03 (0.96, 1.10)   | 1.00 (0.93, 1.07)   |
|                                              | >1411–3906              | 15                         | 0.98 (0.45, 2.15) | 77                       | 0.96 (0.81, 1.13)              | 0.97 (0.90, 1.04)   | 0.96 (0.89, 1.03)   |
|                                              | >3906–113400            | 13                         | 0.92 (0.42, 2.01) | 76                       | 1.09 (0.92, 1.28)              | 1.06 (0.99, 1.14)   | 1.04 (0.97, 1.12)   |
|                                              | P <sub>trend</sub>      |                            | 0.91              |                          | 0.17                           | 0.09                | 0.23                |
| Thiocarbamate<br>Butylate <sup>d</sup>       | 0                       | 52                         | 1.00 (ref)        | 356                      | 1.00 (ref)                     | 1.00 (ref)          | 1.00 (ref)          |
|                                              | 42.5–319                | 6                          | 1.52 (0.51, 4.49) | 36                       | 0.93 (0.75, 1.15)              | 0.99 (0.90, 1.09)   | 0.98 (0.88, 1.08)   |
|                                              | >319–882                | 6                          | 1.20 (0.40, 3.63) | 37                       | 1.10 (0.88, 1.36)              | 0.99 (0.90, 1.09)   | 1.00 (0.91, 1.11)   |
|                                              | >882–2184               | 6                          | 1.03 (0.35, 3.03) | 34                       | 1.13 (0.91, 1.40)              | 0.99 (0.90, 1.09)   | 1.00 (0.91, 1.11)   |
|                                              | >2184–22925             | 8                          | 1.65 (0.59, 4.60) | 35                       | 1.10 (0.88, 1.38)              | 0.99 (0.90, 1.10)   | 0.99 (0.89, 1.10)   |
|                                              | P <sub>trend</sub>      |                            | 0.39              |                          | 0.29                           | 0.89                | 0.90                |



|                      | Intensity-weighted days | Subclinical hypothyroidism |                                | TSH and Thyroid Hormones |                                |                                |                                |
|----------------------|-------------------------|----------------------------|--------------------------------|--------------------------|--------------------------------|--------------------------------|--------------------------------|
|                      |                         | N <sup>b</sup>             | OR (95% CI)                    | N <sup>c</sup>           | TSH<br>Expβ (95% CI)           | T4<br>Expβ (95% CI)            | T3<br>Expβ (95% CI)            |
| EPTC                 | 0                       | 68                         | 1.00 (ref)                     | 462                      | 1.00 (ref)                     | 1.00 (ref)                     | 1.00 (ref)                     |
|                      | 33–225                  | 5                          | 1.26 (0.46, 3.50)              | 31                       | 0.98 (0.80, 1.20)              | 1.01 (0.92, 1.11)              | 1.02 (0.93, 1.12)              |
|                      | >225–588                | 6                          | 1.40 (0.54, 3.62)              | 31                       | 0.95 (0.77, 1.17)              | 0.99 (0.91, 1.09)              | 1.00 (0.91, 1.10)              |
|                      | >588–1792               | 7                          | 2.08 (0.83, 5.18)              | 29                       | 1.09 (0.88, 1.35)              | 0.91 (0.83, 0.99) <sup>†</sup> | 0.89 (0.81, 0.98) <sup>†</sup> |
|                      | >1792–16461             | 6                          | 1.72 (0.66, 4.48)              | 29                       | 1.07 (0.86, 1.32)              | 1.04 (0.95, 1.14)              | 1.06 (0.96, 1.17)              |
|                      | P <sub>trend</sub>      |                            | 0.18                           |                          | 0.45                           | 0.68                           | 0.58                           |
| Phenoxy<br>2,4-D     | 0                       | 20                         | 1.00 (ref)                     | 104                      | 1.00 (ref)                     | 1.00 (ref)                     | 1.00 (ref)                     |
|                      | 68–878                  | 17                         | 0.69 (0.33, 1.45)              | 124                      | 0.96 (0.82, 1.11)              | 0.97 (0.91, 1.04)              | 0.96 (0.89, 1.03)              |
|                      | >878–2604               | 17                         | 0.64 (0.30, 1.36)              | 124                      | 1.00 (0.85, 1.16)              | 0.97 (0.91, 1.04)              | 0.97 (0.91, 1.04)              |
|                      | >2604–7229              | 22                         | 0.76 (0.36, 1.59)              | 126                      | 1.12 (0.96, 1.31)              | 0.96 (0.90, 1.03)              | 0.97 (0.90, 1.04)              |
|                      | >7229–192780            | 22                         | 0.76 (0.35, 1.65)              | 122                      | 1.11 (0.94, 1.31)              | 0.96 (0.89, 1.03)              | 0.94 (0.88, 1.02)              |
|                      | P <sub>trend</sub>      |                            | 0.96                           |                          | 0.10                           | 0.48                           | 0.28                           |
| 2,4,5-T <sup>d</sup> | 0                       | 68                         | 1.00 (ref)                     | 469                      | 1.00 (ref)                     | 1.00 (ref)                     | 1.00 (ref)                     |
|                      | 25–263                  | 4                          | 1.55 (0.45, 5.33)              | 18                       | 0.92 (0.69, 1.23)              | 0.95 (0.84, 1.07)              | 1.06 (0.93, 1.20)              |
|                      | >263–458                | 5                          | 1.33 (0.43, 4.15)              | 22                       | 1.01 (0.78, 1.32)              | 0.95 (0.85, 1.06)              | 0.98 (0.87, 1.10)              |
|                      | >458–1392               | 5                          | 1.56 (0.52, 4.62)              | 20                       | 1.21 (0.94, 1.58)              | 1.06 (0.95, 1.18)              | 1.01 (0.90, 1.13)              |
|                      | >1392–29869             | 4                          | 1.48 (0.42, 5.16)              | 16                       | 1.01 (0.75, 1.37)              | 0.87 (0.77, 0.99) <sup>†</sup> | 0.89 (0.77, 1.01)              |
|                      | P <sub>trend</sub>      |                            | 0.53                           |                          | 0.76                           | 0.06                           | 0.08                           |
| Triazine<br>Atrazine | 0                       | 16                         | 1.00 (ref)                     | 94                       | 1.00 (ref)                     | 1.00 (ref)                     | 1.00 (ref)                     |
|                      | 25–980                  | 20                         | 0.87 (0.37, 2.03)              | 131                      | 0.84 (0.71, 0.99)              | 1.03 (0.96, 1.10)              | 1.06 (0.98, 1.14)              |
|                      | >980–2604               | 12                         | 0.40 (0.16, 1.02)              | 130                      | 0.75 (0.63, 0.88) <sup>†</sup> | 1.04 (0.97, 1.12)              | 1.03 (0.95, 1.11)              |
|                      | >2604–6962              | 28                         | 1.27 (0.52, 3.08)              | 125                      | 0.86 (0.72, 1.03)              | 0.99 (0.92, 1.07)              | 1.01 (0.93, 1.09)              |
|                      | >6962–113400            | 22                         | 1.26 (0.47, 3.36)              | 127                      | 0.88 (0.72, 1.07)              | 0.99 (0.91, 1.08)              | 0.99 (0.90, 1.08)              |
|                      | P <sub>trend</sub>      |                            | 0.26                           |                          | 0.73                           | 0.41                           | 0.27                           |
| Cyanazine            | 0                       | 39                         | 1.00 (ref)                     | 266                      | 1.00 (ref)                     | 1.00 (ref)                     | 1.00 (ref)                     |
|                      | 25–455                  | 14                         | 0.94 (0.43, 2.04)              | 83                       | 0.99 (0.85, 1.15)              | 0.97 (0.91, 1.04)              | 0.95 (0.89, 1.02)              |
|                      | >455–1313               | 5                          | 0.26 (0.09, 0.76)              | 83                       | 0.95 (0.82, 1.10)              | 1.00 (0.94, 1.07)              | 1.04 (0.97, 1.12)              |
|                      | >1313–3689              | 20                         | 2.22 (1.06, 4.61) <sup>†</sup> | 77                       | 1.14 (0.97, 1.33)              | 0.99 (0.92, 1.06)              | 0.99 (0.92, 1.06)              |
|                      | >3689–113400            | 14                         | 0.98 (0.43, 2.26)              | 79                       | 1.07 (0.90, 1.27)              | 1.05 (0.97, 1.13)              | 1.03 (0.95, 1.11)              |
|                      | P <sub>trend</sub>      |                            | 0.58                           |                          | 0.31                           | 0.17                           | 0.49                           |

|                                                    | Intensity-weighted days | Subclinical hypothyroidism |                   | TSH and Thyroid Hormones |                      |                     |                     |
|----------------------------------------------------|-------------------------|----------------------------|-------------------|--------------------------|----------------------|---------------------|---------------------|
|                                                    |                         | N <sup>b</sup>             | OR (95% CI)       | N <sup>c</sup>           | TSH<br>Expβ (95% CI) | T4<br>Expβ (95% CI) | T3<br>Expβ (95% CI) |
| Metribuzin <sup>d</sup>                            | 0                       | 49                         | 1.00 (ref)        | 322                      | 1.00 (ref)           | 1.00 (ref)          | 1.00 (ref)          |
|                                                    | 33–221                  | 3                          | 0.37 (0.1, 1.36)  | 44                       | 0.92 (0.76, 1.12)    | 1.05 (0.97, 1.14)   | 1.05 (0.96, 1.15)   |
|                                                    | >221–385                | 7                          | 0.92 (0.33, 2.54) | 47                       | 0.91 (0.75, 1.10)    | 0.98 (0.90, 1.07)   | 0.93 (0.85, 1.03)   |
|                                                    | >385–1000               | 9                          | 1.64 (0.61, 4.38) | 37                       | 1.22 (0.98, 1.50)    | 1.00 (0.91, 1.10)   | 1.05 (0.95, 1.16)   |
|                                                    | >1000–14850             | 5                          | 0.62 (0.18, 2.07) | 40                       | 0.96 (0.77, 1.19)    | 0.98 (0.89, 1.08)   | 0.99 (0.89, 1.10)   |
|                                                    | P <sub>trend</sub>      |                            | 0.70              |                          | 0.94                 | 0.58                | 0.99                |
| Chloroacetanilide<br>Alachlor                      | 0                       | 30                         | 1.00 (ref)        | 197                      | 1.00 (ref)           | 1.00 (ref)          | 1.00 (ref)          |
|                                                    | 25–502                  | 23                         | 2.21 (1.09, 4.45) | 99                       | 1.04 (0.90, 1.20)    | 1.00 (0.93, 1.06)   | 0.98 (0.92, 1.05)   |
|                                                    | >502–1358               | 8                          | 0.60 (0.25, 1.43) | 95                       | 0.95 (0.82, 1.09)    | 1.02 (0.95, 1.08)   | 0.98 (0.91, 1.04)   |
|                                                    | >1358–4463              | 14                         | 0.82 (0.38, 1.80) | 94                       | 1.03 (0.89, 1.19)    | 0.98 (0.92, 1.05)   | 1.00 (0.93, 1.07)   |
|                                                    | >4463–68162             | 15                         | 0.97 (0.43, 2.18) | 95                       | 0.97 (0.83, 1.14)    | 1.04 (0.97, 1.12)   | 0.99 (0.92, 1.07)   |
|                                                    | P <sub>trend</sub>      |                            | 0.69              |                          | 0.69                 | 0.23                | 0.94                |
| Metolachlor                                        | 0                       | 45                         | 1.00 (ref)        | 285                      | 1.00 (ref)           | 1.00 (ref)          | 1.00 (ref)          |
|                                                    | 25–455                  | 15                         | 1.28 (0.64, 2.55) | 78                       | 1.01 (0.88, 1.17)    | 0.99 (0.93, 1.05)   | 0.96 (0.90, 1.03)   |
|                                                    | >455–1240               | 12                         | 1.07 (0.51, 2.24) | 76                       | 1.10 (0.95, 1.27)    | 1.05 (0.99, 1.12)   | 0.96 (0.90, 1.03)   |
|                                                    | >1240–4232              | 8                          | 0.66 (0.28, 1.55) | 73                       | 0.95 (0.81, 1.11)    | 0.98 (0.92, 1.05)   | 0.98 (0.91, 1.05)   |
|                                                    | >4232–68162             | 12                         | 0.83 (0.36, 1.90) | 73                       | 1.02 (0.86, 1.21)    | 1.00 (0.93, 1.08)   | 0.99 (0.91, 1.07)   |
|                                                    | P <sub>trend</sub>      |                            | 0.54              |                          | 0.89                 | 0.97                | 0.97                |
| Other Herbicides<br>Chlorimuron-ethyl <sup>d</sup> | 0                       | 55                         | 1.00 (ref)        | 394                      | 1.00 (ref)           | 1.00 (ref)          | 1.00 (ref)          |
|                                                    | 30–118                  | 4                          | 1.02 (0.33, 3.10) | 29                       | 0.88 (0.71, 1.09)    | 0.98 (0.89, 1.08)   | 0.95 (0.86, 1.05)   |
|                                                    | >118–315                | 5                          | 1.23 (0.43, 3.54) | 25                       | 0.82 (0.65, 1.03)    | 1.07 (0.97, 1.19)   | 1.02 (0.92, 1.14)   |
|                                                    | >315–588                | 6                          | 1.78 (0.68, 4.66) | 30                       | 1.09 (0.88, 1.35)    | 1.02 (0.93, 1.12)   | 1.00 (0.90, 1.10)   |
|                                                    | >588–7560               | 6                          | 1.74 (0.65, 4.61) | 29                       | 1.04 (0.84, 1.29)    | 1.04 (0.95, 1.15)   | 0.98 (0.89, 1.09)   |
|                                                    | P <sub>trend</sub>      |                            | 0.18              |                          | 0.73                 | 0.27                | 0.81                |
| Dicamba                                            | 0                       | 33                         | 1.00 (ref)        | 196                      | 1.00 (ref)           | 1.00 (ref)          | 1.00 (ref)          |
|                                                    | 36–350                  | 17                         | 1.02 (0.51, 2.04) | 102                      | 0.89 (0.77, 1.02)    | 0.97 (0.91, 1.03)   | 0.94 (0.88, 1.01)   |
|                                                    | >350–1046               | 10                         | 0.53 (0.24, 1.18) | 93                       | 0.94 (0.81, 1.09)    | 0.97 (0.91, 1.03)   | 0.99 (0.92, 1.06)   |
|                                                    | >1046–2699              | 13                         | 0.80 (0.38, 1.69) | 94                       | 0.98 (0.84, 1.13)    | 0.96 (0.90, 1.03)   | 0.99 (0.93, 1.06)   |
|                                                    | >2699–107823            | 16                         | 1.04 (0.51, 2.12) | 96                       | 0.99 (0.86, 1.15)    | 0.99 (0.93, 1.05)   | 0.97 (0.91, 1.04)   |
|                                                    | P <sub>trend</sub>      |                            | 0.71              |                          | 0.52                 | 0.96                | 0.88                |

|                                                        | Intensity-weighted days | Subclinical hypothyroidism |                   | TSH and Thyroid Hormones |                                |                                |                     |
|--------------------------------------------------------|-------------------------|----------------------------|-------------------|--------------------------|--------------------------------|--------------------------------|---------------------|
|                                                        |                         | N <sup>b</sup>             | OR (95% CI)       | N <sup>c</sup>           | TSH<br>Expβ (95% CI)           | T4<br>Expβ (95% CI)            | T3<br>Expβ (95% CI) |
| Glyphosate                                             | 0                       | 26                         | 1.00 (ref)        | 159                      | 1.00 (ref)                     | 1.00 (ref)                     | 1.00 (ref)          |
|                                                        | 20–315                  | 17                         | 1.03 (0.52, 2.03) | 104                      | 0.97 (0.84, 1.12)              | 1.03 (0.97, 1.09)              | 0.97 (0.91, 1.04)   |
|                                                        | >315–907                | 21                         | 1.13 (0.59, 2.15) | 122                      | 1.03 (0.90, 1.18)              | 1.00 (0.95, 1.06)              | 0.99 (0.94, 1.06)   |
|                                                        | >907–2622               | 15                         | 0.81 (0.40, 1.65) | 109                      | 1.03 (0.89, 1.18)              | 1.01 (0.95, 1.07)              | 0.99 (0.93, 1.06)   |
|                                                        | >2622–113400            | 19                         | 1.06 (0.53, 2.11) | 112                      | 1.11 (0.96, 1.28)              | 0.99 (0.93, 1.06)              | 0.97 (0.91, 1.03)   |
|                                                        | P <sub>trend</sub>      |                            | 0.95              |                          | 0.11                           | 0.57                           | 0.44                |
| Imazethapyr                                            | 0                       | 49                         | 1.00 (ref)        | 328                      | 1.00 (ref)                     | 1.00 (ref)                     | 1.00 (ref)          |
|                                                        | 33–263                  | 9                          | 1.14 (0.51, 2.53) | 63                       | 0.91 (0.78, 1.07)              | 0.95 (0.88, 1.01)              | 0.96 (0.89, 1.03)   |
|                                                        | >263–600                | 10                         | 1.15 (0.53, 2.47) | 66                       | 1.10 (0.94, 1.28)              | 0.97 (0.91, 1.03)              | 0.96 (0.89, 1.03)   |
|                                                        | >600–1176               | 12                         | 1.41 (0.67, 2.93) | 64                       | 0.99 (0.85, 1.16)              | 0.93 (0.87, 1.00) <sup>†</sup> | 0.96 (0.90, 1.04)   |
|                                                        | >1176–22500             | 10                         | 1.26 (0.58, 2.73) | 62                       | 1.09 (0.93, 1.28)              | 0.97 (0.91, 1.04)              | 0.99 (0.92, 1.06)   |
|                                                        | P <sub>trend</sub>      |                            | 0.49              |                          | 0.27                           | 0.36                           | 0.78                |
| Petroleum Distillates <sup>d</sup>                     | 0                       | 57                         | 1.00 (ref)        | 371                      | 1.00 (ref)                     | 1.00 (ref)                     | 1.00 (ref)          |
|                                                        | 25–372                  | 5                          | 1.24 (0.44, 3.54) | 26                       | 0.94 (0.75, 1.17)              | 0.98 (0.89, 1.08)              | 0.99 (0.89, 1.09)   |
|                                                        | >372–1110               | 3                          | 0.67 (0.19, 2.36) | 27                       | 1.21 (0.97, 1.51)              | 0.99 (0.90, 1.09)              | 1.00 (0.90, 1.11)   |
|                                                        | >1110–3973              | 5                          | 1.50 (0.51, 4.40) | 22                       | 1.12 (0.87, 1.43)              | 1.04 (0.93, 1.15)              | 1.06 (0.95, 1.19)   |
|                                                        | >3973–253333            | 2                          | 0.43 (0.09, 1.93) | 23                       | 1.04 (0.81, 1.32)              | 1.10 (0.99, 1.22)              | 0.92 (0.83, 1.03)   |
|                                                        | P <sub>trend</sub>      |                            | 0.32              |                          | 0.63                           | 0.07                           | 0.25                |
| <b>FUMIGANTS</b>                                       |                         |                            |                   |                          |                                |                                |                     |
| Carbon Tetrachloride/<br>Carbon Disulfide <sup>d</sup> | 0                       | 86                         | 1.00 (ref)        | 556                      | 1.00 (ref)                     | 1.00 (ref)                     | 1.00 (ref)          |
|                                                        | 6–170                   | 4                          | 2.14 (0.63, 7.19) | 14                       | 1.11 (0.82, 1.51)              | 0.96 (0.84, 1.09)              | 0.95 (0.82, 1.09)   |
|                                                        | >170–18563              | 3                          | 1.31 (0.33, 5.22) | 12                       | 1.18 (0.84, 1.64)              | 0.94 (0.82, 1.09)              | 0.93 (0.80, 1.09)   |
|                                                        | P <sub>trend</sub>      |                            | 0.65              |                          | 0.32                           | 0.39                           | 0.36                |
| Methyl Bromide                                         | 0                       | 91                         | 1.00 (ref)        | 561                      | 1.00 (ref)                     | 1.00 (ref)                     | 1.00 (ref)          |
|                                                        | 12–1139                 | 4                          | 0.93 (0.26, 3.40) | 21                       | 1.05 (0.79, 1.40)              | 0.93 (0.83, 1.06)              | 0.92 (0.81, 1.05)   |
|                                                        | >1139–102000            | 2                          | 0.28 (0.06, 1.43) | 25                       | 0.69 (0.53, 0.92) <sup>†</sup> | 1.17 (1.03, 1.31) <sup>†</sup> | 1.11 (0.98, 1.26)   |
|                                                        | P <sub>trend</sub>      |                            | 0.12              |                          | 0.01 <sup>†</sup>              | <0.01 <sup>†</sup>             | 0.049 <sup>†</sup>  |
| <b>FUNGICIDES</b>                                      |                         |                            |                   |                          |                                |                                |                     |
| Captan                                                 | 0                       | 81                         | 1.00 (ref)        | 513                      | 1.00 (ref)                     | 1.00 (ref)                     | 1.00 (ref)          |
|                                                        | 2–12                    | 2                          | 0.31 (0.07, 1.33) | 35                       | 0.87 (0.72, 1.06)              | 1.08 (0.99, 1.17)              | 1.07 (0.98, 1.17)   |
|                                                        | >12–46500               | 7                          | 1.74 (0.71, 4.29) | 29                       | 1.22 (0.99, 1.51)              | 1.04 (0.95, 1.15)              | 1.02 (0.92, 1.12)   |
|                                                        | P <sub>trend</sub>      |                            | 0.20              |                          | 0.06                           | 0.38                           | 0.78                |
| Metalaxyl <sup>d</sup>                                 | 0                       | 83                         | 1.00 (ref)        | 506                      | 1.00 (ref)                     | 1.00 (ref)                     | 1.00 (ref)          |
|                                                        | 3–141                   | 5                          | 0.93 (0.33, 2.62) | 27                       | 1.05 (0.84, 1.31)              | 1.02 (0.93, 1.13)              | 1.04 (0.93, 1.15)   |
|                                                        | >141–30341              | 2                          | 0.31 (0.07, 1.47) | 25                       | 0.73 (0.57, 0.93) <sup>†</sup> | 1.08 (0.97, 1.21)              | 0.97 (0.86, 1.09)   |
|                                                        | P <sub>trend</sub>      |                            | 0.14              |                          | 0.01 <sup>†</sup>              | 0.17                           | 0.57                |

TSH: Thyroid stimulating hormone; T4: thyroxine; T3: triiodothyronine; Anti-TPO: Anti-thyroid peroxidase; OR: odds ratio; 95% CI: 95% Confidence Interval; Expβ: Exponentiated β

<sup>a</sup>Adjusted for age, state, body mass index, smoking, correlated pesticides

<sup>b</sup>Exposed cases

<sup>c</sup>Total exposed

<sup>d</sup>Detailed information for these chemicals was collected on the take-home questionnaire at enrollment

<sup>†</sup>p<0.05 compared with never users
